# Supplementary material for: Hemozoin-mediated inflammasome activation limits long-lived anti-malarial immunity
Source: PubMed Central journal article supplement — Cell Rep. Author manuscript; Available in PMC 2021 Sep 10. (PMC8432597; doi:10.1016/j.celrep.2021.109586), 2021-08-24
Supplement: NIHMS1735792-supplement-1.pdf [file NIHMS1735792-supplement-1.pdf]

**Cell Reports, Volume 36**

**Supplemental information**

**Hemozoin-mediated inflammasome activation**

**limits long-lived anti-malarial immunity**

**Angela D. Pack, Patrick V. Schwartzhoff, Zeb R. Zacharias, Daniel Fernandez-Ruiz, William R. Heath, Prajwal Gurung, Kevin L. Legge, Chris J. Janse, and Noah S. Butler**

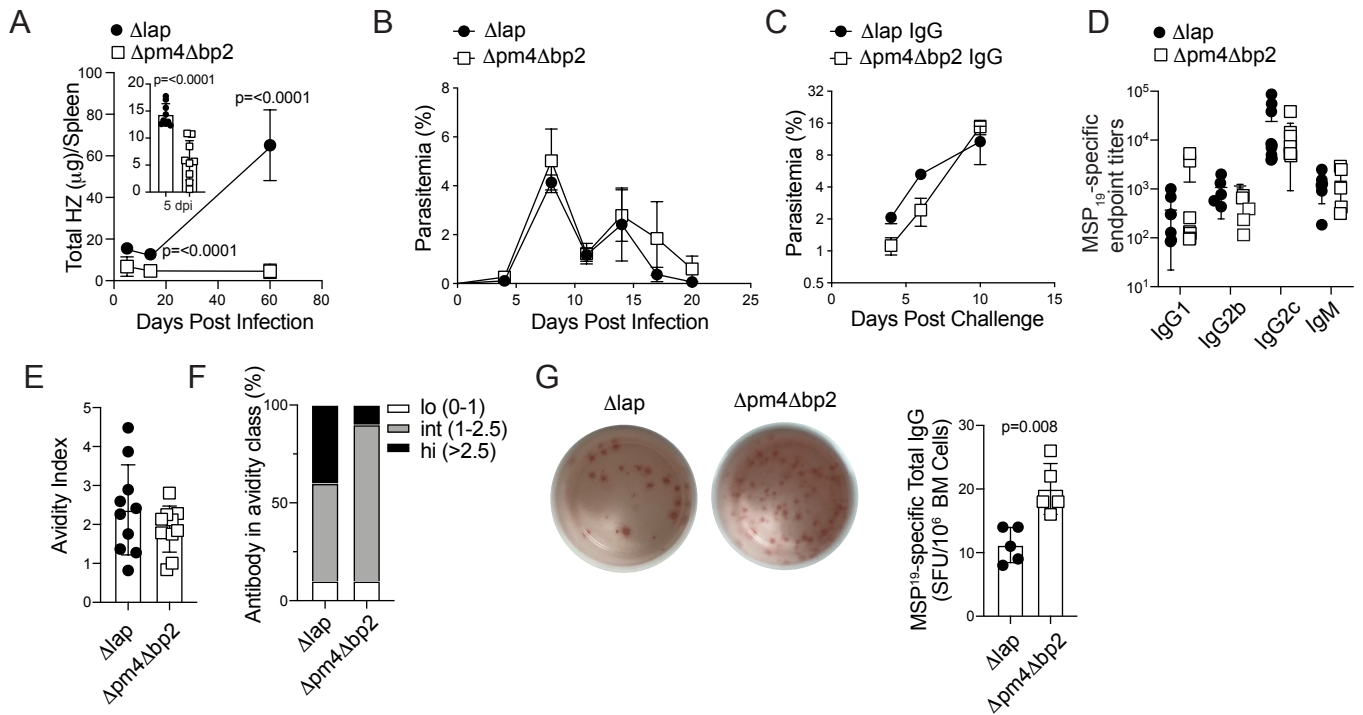

**Supplemental Figure 1.** Growth and clearance kinetics of  $\Delta pm4\Delta bp2$  and  $\Delta lap$  parasites and total parasite-specific antibody titers during primary infection (Related to Figure 1)

(A) Quantification of hemozoin abundance in spleen of mice following primary infection with  $\Delta pm4\Delta bp2$  and  $\Delta lap$  parasites. (B) Kinetics of circulating parasite burden during primary infection with  $\Delta pm4\Delta bp2$  and  $\Delta lap$  parasites. (C) Kinetics of circulating parasite burden during virulent *Pb* ANKA challenge of naïve mice receiving purified IgG from  $\Delta pm4\Delta bp2$  and  $\Delta lap$  immune donors. (D) MSP119-specific endpoint titers at approximately 60 days p.i. (E) Avidity index, determined by the amount (M) of NH<sub>4</sub>SCN needed to elute MSP1<sub>1-19</sub>-specific antibodies and percentage of antibodies per class (lo,int,hi) (F). (G) Representative images and summary of MSP1<sub>1-19</sub>-specific ELISPOT of bone marrow PCs on day 60 following infection with mutant parasites. Data (Mean +/- S.E.M) in panel B are summary of 3 experiments with n=4-6. Data (Mean +/- S.D.) in panels A,C and D-F are summary from 2 independent experiments. Data (Mean +/- S.D.) in G are representative of 3 experiments with n=4-6.

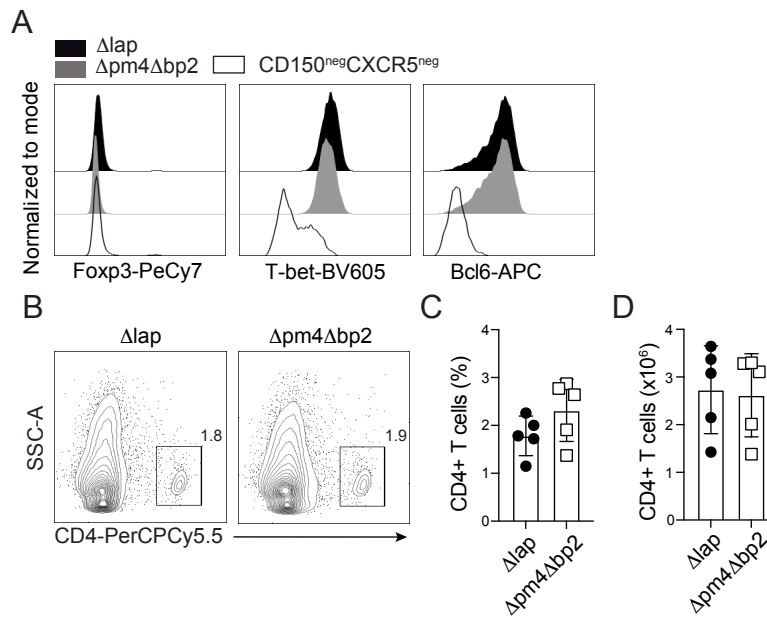

**Supplemental Figure 2.** Transcription factor expression and CD4 T cell engraftment in  $Tcr\alpha^{-/-}$  recipients (Related to Figure 3) (A) Representative histograms of Foxp3, T-bet, and Bcl-6 expression in polyclonal  $CXCR5^{hi}PD-1^{hi}$  GC TFH (14 dpi) shown in figure 3I. Relative gMFI was calculated by dividing the gMFI of each transcription factor within the GC TFH population by that of the  $CD150^{neg}CXCR5^{neg}$   $CD4$  population within each respective sample.  $CD150^{lo}CXCR5^{int}$   $CD4^{+}$  T cells were sorted from mice infected with  $\Delta pm4\Delta bp2$  and  $\Delta lap$  parasites (d7) and were transferred to  $Tcr\alpha^{-/-}$  recipients (B) Representative flow plots defining  $CD4^{+}$  T cells collected from  $Tcr\alpha^{-/-}$  recipients 14 days after infection with either  $\Delta pm4\Delta bp2$  or  $\Delta lap$  parasites. Frequency (C) and number (D) of  $CD4^{+}$  T cells within the total lymphocyte gate in the spleens of  $Tcr\alpha^{-/-}$  mice receiving  $CD150^{lo}CXCR5^{int}$   $CD4^{+}$  T cells from either  $\Delta pm4\Delta bp2$  or  $\Delta lap$  infected donor mice. Data (Mean  $\pm$  S.D.) are representative of 2 independent experiments with  $n=4-5$ .

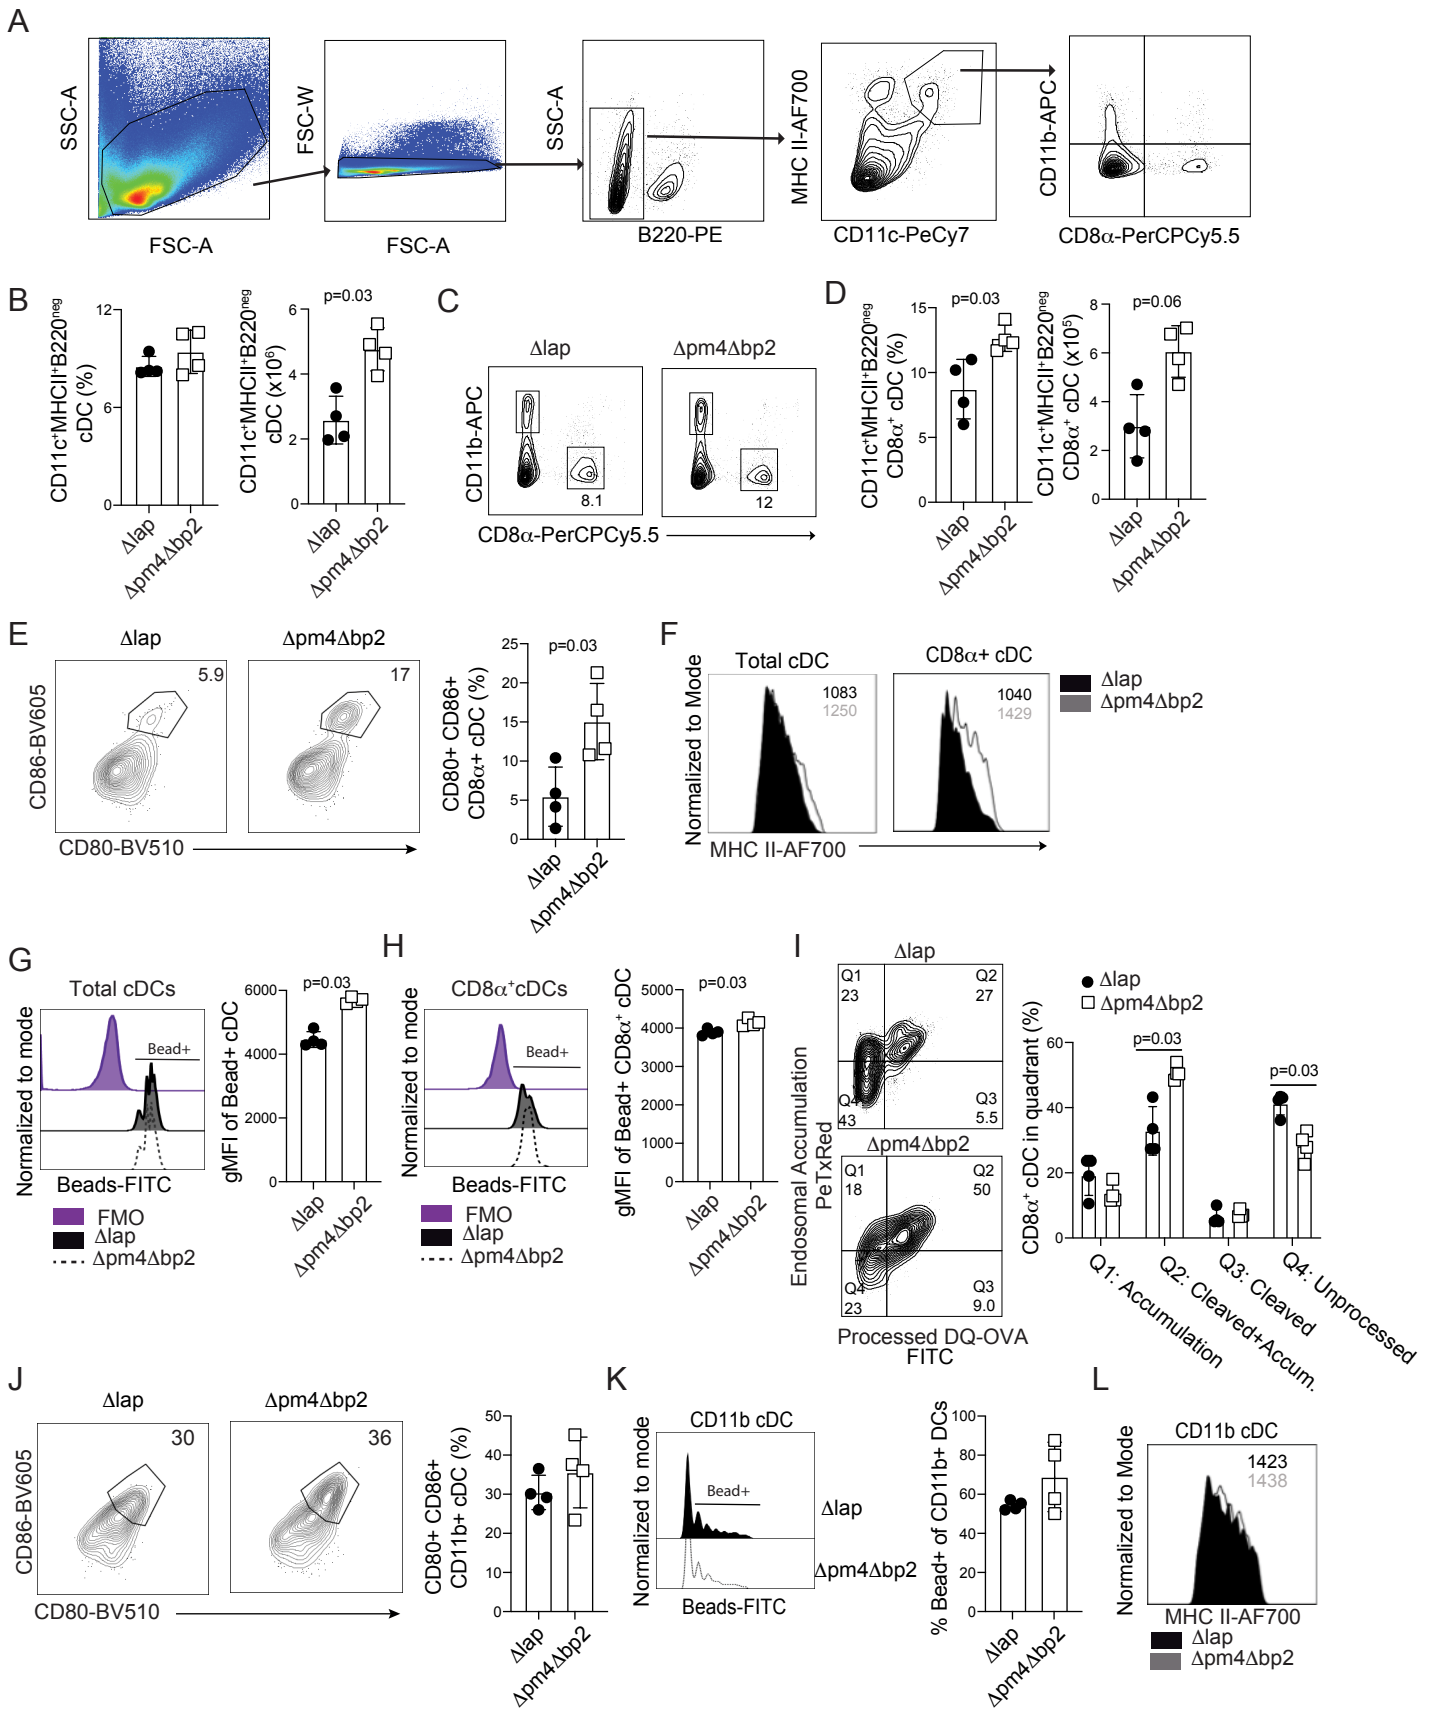

**Supplemental Figure 3.** Representative cDC1 and cDC2 gating, CD80 and CD86 expression and impacts of hemozoin on cDC2 phenotype and function (Related to Figure 4)

(A) Gating strategy for identification of total (CD11c<sup>+</sup>MHCII<sup>+</sup>B220<sup>neg</sup>) conventional dendritic cells (cDC), cDC2 (CD11b<sup>+</sup>CD8 $\alpha$ <sup>neg</sup>) and cDC1 (CD11b<sup>neg</sup>CD8 $\alpha$ <sup>+</sup>). C57BL/6 mice were infected with either  $\Delta$ pm4 $\Delta$ bp2 or  $\Delta$ lap parasites and spleens were harvested on day 10 p.i. and DC were liberated by digestion as described in Methods. Frequency and number of total CD11c<sup>+</sup>MHCII<sup>+</sup>B220<sup>neg</sup> conventional DC (B) and CD11b<sup>neg</sup>CD8 $\alpha$ <sup>+</sup> cDC1 (C,D). (E) CD80 and CD86 expression on CD11b<sup>neg</sup>CD8 $\alpha$ <sup>+</sup> cDC1 on day 10 p.i. (F) MHC II expression on total and CD11b<sup>neg</sup>CD8 $\alpha$ <sup>+</sup> cDC1. Histogram and summary graphs of bead positive total (G) and CD11b<sup>neg</sup>CD8 $\alpha$ <sup>+</sup> cDC1 (H) recovered from  $\Delta$ lap (shaded),  $\Delta$ pm4 $\Delta$ bp2-infected mice (dotted), control (no-beads) (shaded purple). (I) Flow plots and summary data of DQ-OVA protein processing assay with CD11b<sup>neg</sup>CD8 $\alpha$ <sup>+</sup> cDC. CD80 and CD86 expression (J) on CD11b<sup>+</sup>CD8 $\alpha$ <sup>neg</sup> cDC2 on day 10 p.i. (K) In vitro fluorescent bead phagocytosis by CD11b<sup>+</sup>CD8 $\alpha$ <sup>neg</sup> cDC2 on day 10 p.i. (L) MHC II expression on CD11b<sup>+</sup>CD8 $\alpha$ <sup>neg</sup> cDC2. All presented data (Mean +/- S.D.) are representative of 4 independent experiments with n=4-5.

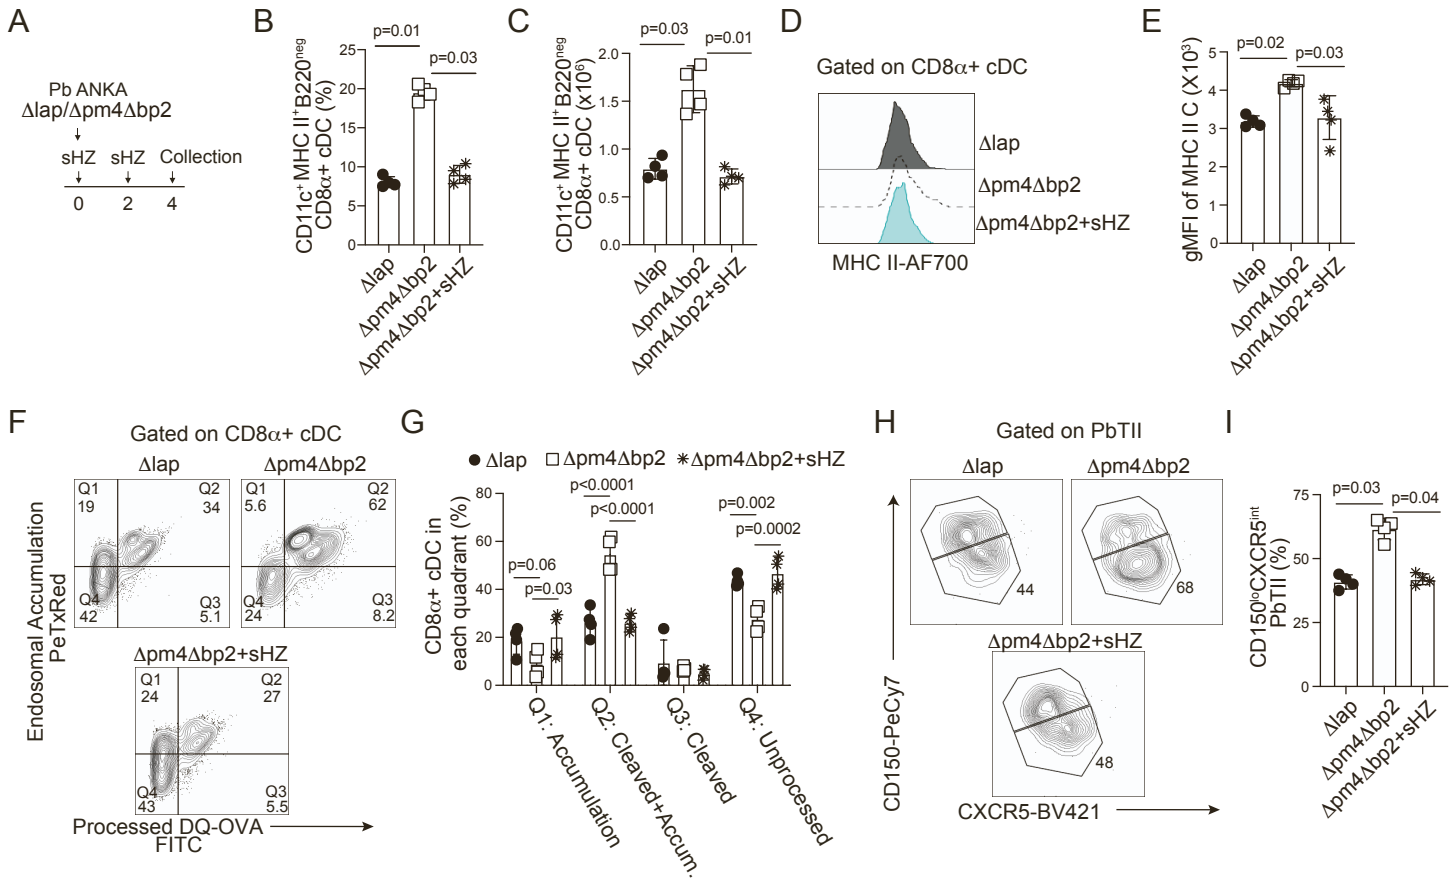

**Supplemental Figure 4.** Injection of synthetic hemozoin compromises cDC1 and alters T<sub>FH</sub> differentiation (Related to Figure 5) (A) WT mice were infected with  $\Delta lap$  or  $\Delta pm4\Delta bp2$  parasites and injected with PBS, while an additional group of  $\Delta pm4\Delta bp2$ -infected animals received injections of synthetic hemozoin (sHZ). Spleens were collected on day 4 of infection for analysis. Frequency and number (B,C) and representative histograms and summary graph of gMFI of MHC II expression (D,E) on CD11b<sup>neg</sup>CD8 $\alpha$ <sup>+</sup> cDC1. (F,G) Flow plots and summary data of DQ-OVA protein processing assay. Representative plots (H) and frequency (I) of T<sub>FH</sub> precursor (CD150<sup>lo</sup>CXCR5<sup>int</sup>) by day 4 p.i. All data (Mean +/- S.D.) are representative of two independent experiments with n=4 per group.

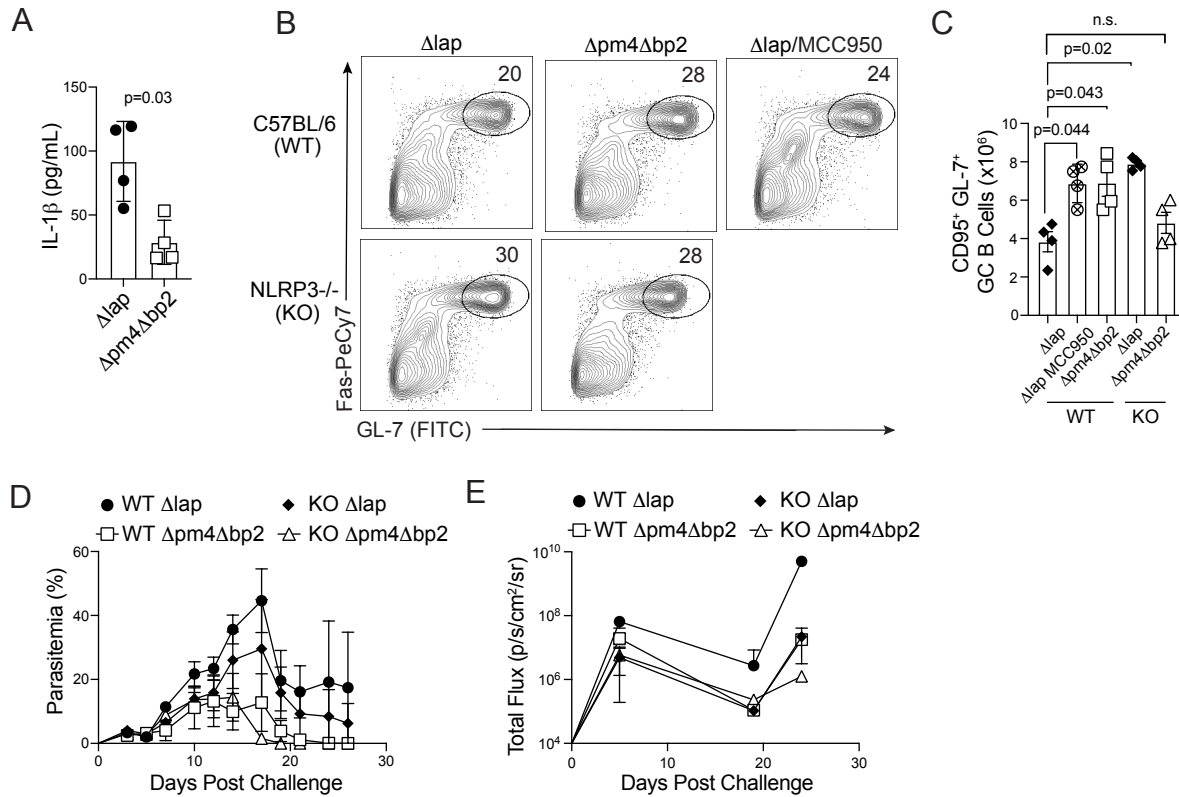

**Supplemental Fig. 5.** IL-1 $\beta$  in mutant *P. berghei*-infected WT mice and humoral immune responses and protection following *P. yoelii*-infection in WT and NLRP3 $^{-/-}$  mice (Related to Figure 1C and Figure 6E-G)

(A) Serum IL-1 $\beta$  levels on day 10 p.i. following infection with  $\Delta lap$  and  $\Delta pm4\Delta bp2$  parasites. Data are representative of two independent experiments. C57BL/6 (WT) and NLRP3 $^{-/-}$  (KO) mice were infected with  $\Delta pm4\Delta bp2$  and  $\Delta lap$  and WT mice were treated with MCC950 after  $\Delta lap$  infection. Representative flows (B) and frequency (C) of CD95 $^{+}$ GL-7 $^{+}$  GC B cells day 14 p.i. C57BL/6 and NLRP3 $^{-/-}$  mice were immunized with  $\Delta pm4\Delta bp2$  and  $\Delta lap$  parasites sixty days prior to challenge with a virulent *Pb* ANKA strain. Circulating (D) and total (E) parasite burden were quantified from mice used in Fig. 6E-G and Fig. 1C, respectively. Data (Mean  $\pm$  S.D.) in panels A-D are representative of two independent experiments with  $n=3-4$  per experimental group. Data in panel E (Mean  $\pm$  S.E.M.) are summary data from two independent experiments and include luciferase imaging data from wild-type mice presented in Fig. 1C.

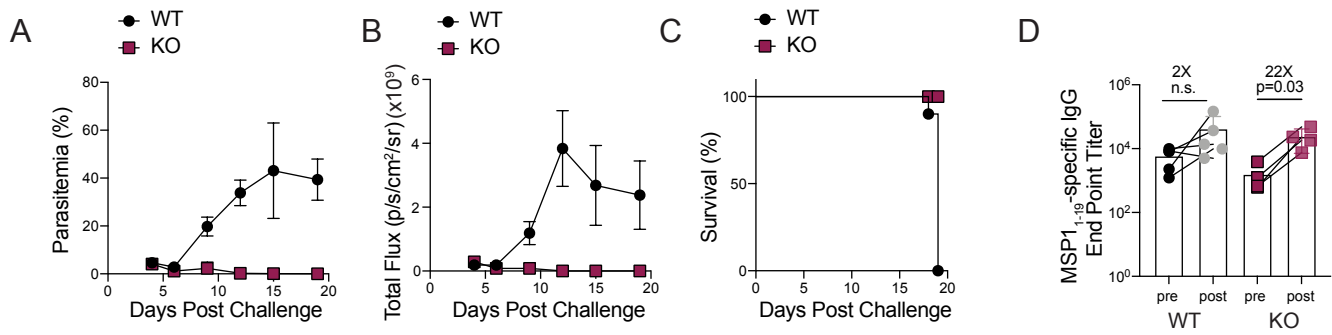

**Supplemental Figure 6.** Hemozoin compromises protective humoral immunity generated following *P. yoelii* 17XNL infection (Related to Figure 7) At approximately 50 days post immunization with *P. yoelii* 17XNL parasites, C57BL/6 (WT) and NLRP3<sup>-/-</sup> (KO) mice were challenged with a virulent *Pb* ANKA strain. Circulating (A) and total (B) parasite burden was quantified. (C) Frequency of immune mice that survived virulent *Pb*-ANKA challenge. (D) MSP1<sub>1-19</sub>-specific IgG endpoint titers one day prior to (pre) and 5 days after (post) virulent *Pb*-ANKA challenge of *P. yoelii*-immune WT and NLRP3<sup>-/-</sup> mice. Data (Mean +/- S.D.) are representative of one experiment with n=5 per experimental group.
